# Supplementary material for: The Genetic Characteristics and Carbapenem Resistance Mechanism of ST307 Klebsiella pneumoniae Coharbouring blaCMY-6, blaOXA-48, and a Truncated blaNDM-1
Source: MDPI journal article supplement (doi:10.3390/antibiotics11111616), 2022-11-13
Supplement: s1 [file s1]

**Figure S1** (A) The PFGE pattern of CHN24001, CHN24003, CHN24025, CHN24039, and CHN24069. (B) Minimum spanning tree of CHN24001, CHN24003, CHN24025, CHN24039, and CHN24069 analyzed by cgMLST.

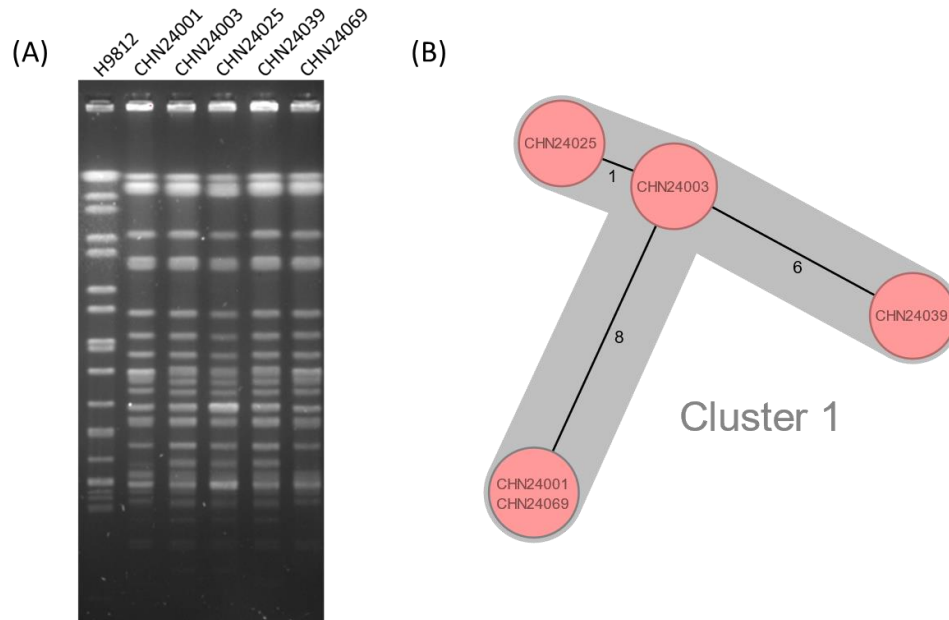

**Figure S2** The schematic of truncated *bla*<sub>NDM-1</sub> interrupted by *IS10*. The direct repeats (DRs) flanked the insertion were TGCTGAGCG, and the inverted repeats (IRs) of *IS10* close to the DRs were CTGATGAATCCCCT and AGGGGATCTCTCAG, respectively.

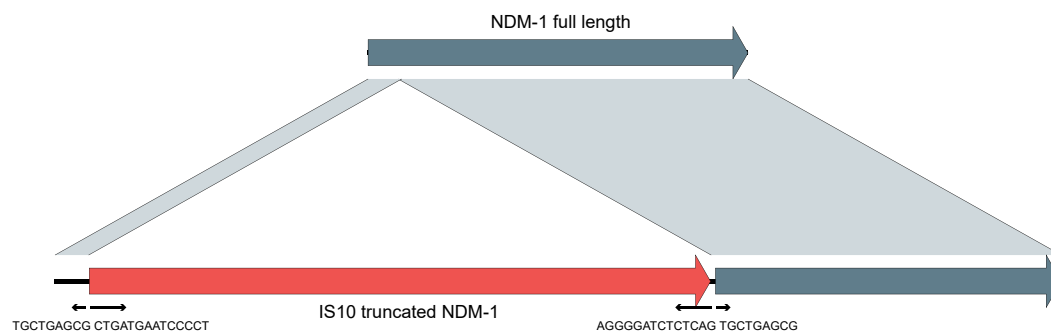

**Figure S3** The CTX-M-15 harbouring plasmid comparison among these isolates. The red ring represents CHN24001, the yellow ring represents CHN24003, the blue ring represents CHN24025, the brown ring represents CHN24039, and the green ring represents CHN24069. Antimicrobial resistance genes (ARGs) and mobile genetic elements (MGEs) were labelled on the outer ring.

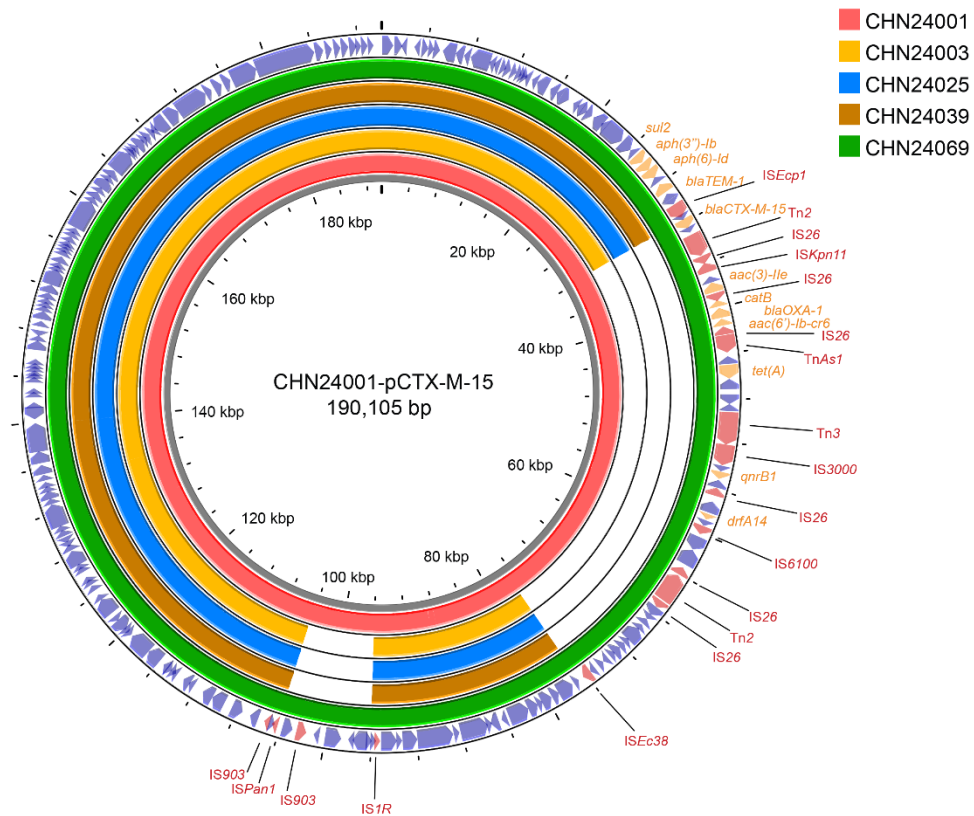

Table S1 The primers used in this study.

| Primers                 | Sequence (5'-3')                                  | Description                                                                       |
|-------------------------|---------------------------------------------------|-----------------------------------------------------------------------------------|
| Southern Blot           |                                                   |                                                                                   |
| NDM-1-F-Southern        | CGCAACACAGCCTGACTTTC                              | NDM-1 probe for southern blot                                                     |
| NDM-1-R-Southern        | GGCGGAATGGCTCATCACGA                              |                                                                                   |
| OXA-48-F-Southern       | GCGTGGTTAAGGATGAACAC                              |                                                                                   |
| OXA-48-R-Southern       | CATCAAGTTCAACCCAACCG                              |                                                                                   |
| Conjugation             |                                                   |                                                                                   |
| NDM-1-F-Validate        | ATGGAATTGCCCAATATTATGCACCCGGTC                    | NDM-1 full length validation                                                      |
| NDM-1-R-Validate        | TCAGCGCAGCTTGTCGGCCA                              |                                                                                   |
| OXA-48-F-Validate       | ATGCGTGTATTAGCCTTATC                              | OXA-48 full length validation                                                     |
| OXA-48-R-Validate       | CTAGGGAATAATTTTTTCCTGTTTG                         |                                                                                   |
| Gene cloning            |                                                   |                                                                                   |
| pCR2.1-del-AmpR-1       | caggatgaggatcgtttcgcATGATTGAACAAGATGGATTGCAC      | Amplification for kanamycin resistance gene                                       |
| pCR2.1-del-AmpR-2       | gagtaaacttggtctgacagTCAGAAGAACTCGTCAAGAAGGC       |                                                                                   |
| pCR2.1-del-AmpR-3       | CTGTCAGACCAAGTTTACTCATATATACTTT                   | Amplification for backbone of pCR2.1                                              |
| pCR2.1-del-AmpR-4       | GCGAAACGATCCTCATCCTG                              |                                                                                   |
| NDM-1-truncated-clone-F | atatccatcacactggcgccgcTAAATTGGAGTCATTACCAGATTGGC  | Amplification for truncated NDM-1 gene and its promoter                           |
| NDM-1-truncated-clone-R | actataggcggaattgggccTCAGCGCAGCTTGTCGGC            |                                                                                   |
| NDM-1-FL-clone-1        | ggcaattccatCAAGTTTTCCTTTTATTCAGCATTA              | Amplification for full length NDM-1 gene and the same promoter to truncated NDM-1 |
| NDM-1-FL-clone-2        | gaaaacttgATGGAATTGCCCAATATTATGCA                  |                                                                                   |
| CMY-6-FL-clone-F        | gattacgccaagcttggtaccATGTTACAATGTGTGAGAAGCAGTCTAA | Amplification for CMY-6 gene and its promoter                                     |
| CMY-6-FL-clone-R        | gcggccgttactagtggatccTTATTGCAGCTTTTCAAGAATGCG     |                                                                                   |
| OXA-48-FL-clone-F       | gattacgccaagcttggtaccCCATCATACACTAAATCAGTAAGTTGGC | Amplification for OXA-48 gene and its promoter                                    |
| OXA-48-FL-clone-R       | gcggccgttactagtggatccCTAGGGAATAATTTTTTCCTGTTTGA   |                                                                                   |

Table S2 The ST307 isolates worldwide used in the phylogenetic analysis.

| Isolates         | Accession number                | Region        |
|------------------|---------------------------------|---------------|
| EC03605938       | GCF_015264255.1_ASM1526425v1    | Africa        |
| EC03607707       | GCF_015264295.1_ASM1526429v1    | Africa        |
| EC03607709       | GCF_015264315.1_ASM1526431v1    | Africa        |
| EC03612985       | GCF_015264215.1_ASM1526421v1    | Africa        |
| EC03629993       | GCF_015264225.1_ASM1526422v1    | Africa        |
| EC03632007       | GCF_015594555.1_ASM1559455v1    | Africa        |
| G3435            | GCF_002187305.1_ASM218730v1     | Africa        |
| I72              | GCF_003934185.1_ASM393418v1     | Africa        |
| Kpn01733         | GCF_902703005.1_Kpn01733        | Africa        |
| Q1445            | GCF_903111795.1_CHZ10           | Africa        |
| C1287            | GCF_003954965.1_ASM395496v1     | Asia          |
| CPKp171210       | GCF_009760795.1_ASM976079v1     | Asia          |
| ESBL-SIUK-7      | GCF_002239875.1_ASM223987v1     | Asia          |
| P169             | GCF_003954015.1_ASM395401v1     | Asia          |
| P781             | GCF_003954605.1_ASM395460v1     | Asia          |
| R2476            | GCF_003955155.1_ASM395515v1     | Asia          |
| R3643            | GCF_003953995.1_ASM395399v1     | Asia          |
| ST307PT02        | GCF_003597715.1_ASM359771v1     | Asia          |
| ST307PT03        | GCF_003597735.1_ASM359773v1     | Asia          |
| WCHKP080018      | GCF_003261645.1_ASM326164v1     | Asia          |
| EuSCAPE_BE031    | GCF_900506285.1_19506_1_10      | Europe        |
| EuSCAPE_ES138    | GCF_900501105.1_18623_1_124     | Europe        |
| EuSCAPE_ES149    | GCF_900501135.1_18623_1_135     | Europe        |
| EuSCAPE_FR035    | GCF_900510505.1_17870_2_73      | Europe        |
| EuSCAPE_RO055    | GCF_900504075.1_19084_3_140     | Europe        |
| ISMETT ST307 cl5 | GCF_015321515.1_ASM1532151v1    | Europe        |
| Kpn17            | GCF_015643815.1_ASM1564381v1    | Europe        |
| kpneu006         | GCF_900607435.1_kpneu006        | Europe        |
| Kpngiani7132586  | GCF_902704005.1_Kpngiani7132586 | Europe        |
| Kpngiani7132589  | GCF_902703845.1_Kpngiani7132589 | Europe        |
| CRK0019          | GCF_002186005.2_ASM218600v2     | North America |
| CRK0072          | GCF_002186255.2_ASM218625v2     | North America |
| CRK0080          | GCF_002185575.2_ASM218557v2     | North America |
| CRK0135          | GCF_001902865.4_ASM190286v4     | North America |
| CRK0353          | GCF_002936395.2_ASM293639v2     | North America |
| CRK0363          | GCF_002935385.2_ASM293538v2     | North America |
| CRK0372          | GCF_002935665.2_ASM293566v2     | North America |
| CRK0379          | GCF_002935585.2_ASM293558v2     | North America |
| KCJ3K379         | GCF_008245305.1_ASM824530v1     | North America |
| KLP00218         | GCF_012952365.1_ASM1295236v1    | North America |
| 5R               | GCF_003194695.1_ASM319469v1     | South America |
| CCBH26672        | GCF_016056175.1_ASM1605617v1    | South America |

|               |                              |               |
|---------------|------------------------------|---------------|
| CCBH27755     | GCF_016055435.1_ASM1605543v1 | South America |
| CCBH27869     | GCF_015666615.1_ASM1566661v1 | South America |
| GMR-RA-453.16 | GCF_002283495.1_ASM228349v1  | South America |
| preta         | GCF_003194705.1_ASM319470v1  | South America |
| ARLG-3198     | C252                         | USA: Houston  |
| ARLG-4260     | C4691                        | USA: Houston  |
| KPN1022       | SRR5385804                   | USA: Houston  |
| KPN1109       | SRR5385730                   | USA: Houston  |
| KPN1329       | SRR5386846                   | USA: Houston  |
| KPN1333       | SRR5386842                   | USA: Houston  |
| KPN1388       | SRR5386789                   | USA: Houston  |
| KPN1390       | SRR5386787                   | USA: Houston  |
| KPN1499       | SRR5386673                   | USA: Houston  |
| KPN1595       | SRR5386132                   | USA: Houston  |
| KPN1598       | SRR5386129                   | USA: Houston  |
| KPN161        | SRR5386427                   | USA: Houston  |
| KPN1634       | SRR5386106                   | USA: Houston  |
| KPN1651       | SRR5386095                   | USA: Houston  |
| KPN1677       | SRR5386069                   | USA: Houston  |
| KPN1678       | SRR5386068                   | USA: Houston  |
| KPN1687       | SRR5386061                   | USA: Houston  |
| KPN1723       | SRR5386025                   | USA: Houston  |
| KPN1761       | SRR5385976                   | USA: Houston  |
| KPN182        | SRR5386412                   | USA: Houston  |
| KPN1868       | SRR5387398                   | USA: Houston  |
| KPN1894       | SRR5387374                   | USA: Houston  |
| KPN1925       | SRR5387353                   | USA: Houston  |
| KPN1999       | SRR5387294                   | USA: Houston  |
| KPN2027       | SRR5387268                   | USA: Houston  |
| KPN2038       | SRR5387258                   | USA: Houston  |
| KPN2083       | SRR5387217                   | USA: Houston  |
| KPN2086       | SRR5387214                   | USA: Houston  |
| KPN2098       | SRR5387203                   | USA: Houston  |
| KPN280        | SRR5386324                   | USA: Houston  |
| KPN287        | SRR5386317                   | USA: Houston  |
| KPN336        | SRR5386271                   | USA: Houston  |
| KPN347        | SRR5386262                   | USA: Houston  |
| KPN354        | SRR5386258                   | USA: Houston  |
| KPN364        | SRR5386248                   | USA: Houston  |
| KPN485        | SRR5385515                   | USA: Houston  |
| KPN515        | SRR5385503                   | USA: Houston  |
| KPN575        | SRR5385452                   | USA: Houston  |
| KPN578        | SRR5385449                   | USA: Houston  |
| KPN611        | SRR5385420                   | USA: Houston  |

|          |              |              |
|----------|--------------|--------------|
| KPN859   | SRR5386473   | USA: Houston |
| KPN863   | SRR5386469   | USA: Houston |
| KPN877   | SRR5385931   | USA: Houston |
| KPN913   | SRR5385899   | USA: Houston |
| KPN925   | SRR5385888   | USA: Houston |
| KPN940   | SRR5385873   | USA: Houston |
| CHN24001 | SAMN27864414 | This study   |
| CHN24003 | SAMN27864415 | This study   |
| CHN24025 | SAMN27864421 | This study   |
| CHN24039 | SAMN27864422 | This study   |
| CHN24069 | SAMN27864428 | This study   |

---
